# Supplementary material for: Obesity-induces Organ and Tissue Specific Tight Junction Restructuring and Barrier Deregulation by Claudin Switching
Source: PubMed Central journal article supplement (PMC5505957; doi:10.1038/s41598-017-04989-8), 2017-07-11

## **Obesity-induces Organ and Tissue Specific Tight Junction Restructuring and Barrier Deregulation by Claudin Switching**

Rizwan Ahmad<sup>1</sup>, Bilal Rah<sup>1</sup>, Dundy Bastola<sup>2</sup>, Punita Dhawan<sup>1,3</sup> and Amar B. Singh<sup>1,3</sup>

<sup>1</sup>Department of Biochemistry and Molecular Biology, University of Nebraska Medical Center, Omaha, NE 68198, <sup>2</sup>Department of Bioinformatics, University of Nebraska Omaha, and <sup>3</sup>VA Nebraska-Western Iowa Health Care System, Omaha, NE

## Supplementary Figures Legends:

**Supplementary Figure 1: Leptin or DCA-treatment suppresses claudin-2 expression in MDCK-II cells.** Polarized monolayer of renal tubular epithelial cells, MDCK-II cells, was subjected to DCA (20  $\mu$ m) or Leptin (250 ng/ml)-treatment (in complete culture medium) for twenty-four hours. **a.** Effect of DCA-treatment upon claudin expression using immunoblot analysis; **b.** Quantitative analysis of the antigen specific band intensity from immunoblot analysis; **c.** Effect of Leptin-treatment upon claudin expression using immunoblot analysis; **d.** Quantitative analysis of the antigen specific band intensity from immunoblot analysis; Values are presented as mean $\pm$ SEM. \*\*\*P  $\leq$  0.001, \*\*P  $\leq$  0.01 and \*P  $\leq$  0.05 compared to control.

**Supplementary Figure 2: DCA and Leptin treatment induces time dependent phosphorylation of NF-kB and JUN MAP Kinase in intestinal epithelium cells:** Caco-2 cells was subjected time dependently to DCA and Leptin. Immunoblot analysis NF-kB, JUN MAP Kinase and ERK1/2 MAP Kinase during time dependent exposure of DCA and leptin.

**Supplementary Figure-3: a.** PPI sub-network induced by proteins interacting with claudin-2 and proteins annotated with tight junction, Sodium/Calcium Ion Transport and Colorectal cancer related functions. Majority of proteins interacting with claudin-2 are annotated with tight junction function (A $\cap$ B). While these proteins are also found to be associate with colorectal cancer (A $\cap$ E), calcium ion transport (A $\cap$ D), non-was associated with sodium transport function (A $\cap$ C). Other overlapping functional relationships between two or more groups are also show. ; **b.** PPI sub-network induced by proteins interacting with claudin-7 and proteins annotated with Tight Junction, Sodium/Calcium Ion Transport

and Colorectal cancer related functions. Majority of proteins interacting with claudin-7 are annotated with tight junction function ( $A \cap B$ ). While these proteins are also found to be associated with colorectal cancer ( $A \cap E$ ), calcium ion transport ( $A \cap E$ ), non-was associated with sodium transport function ( $A \cap D$ ). Other overlapping functional relationships between two or more groups are also show.

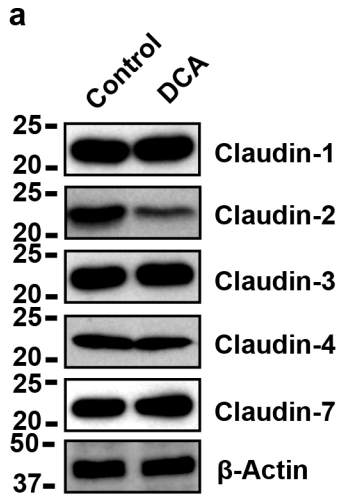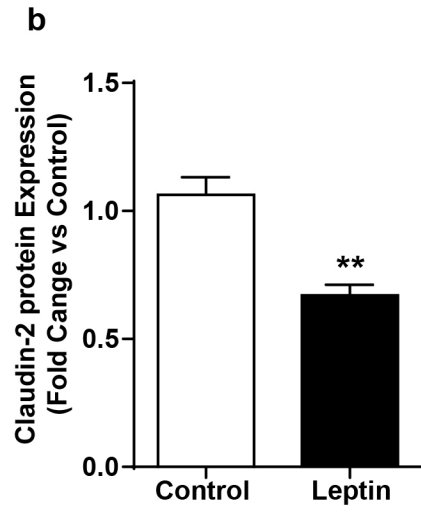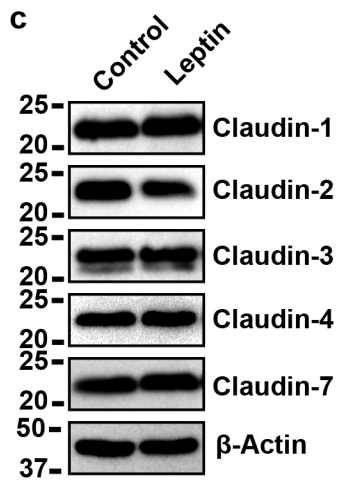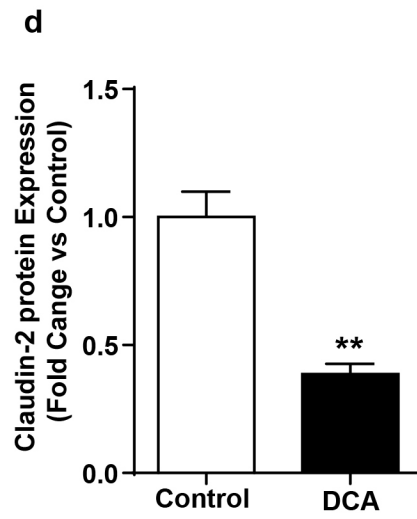

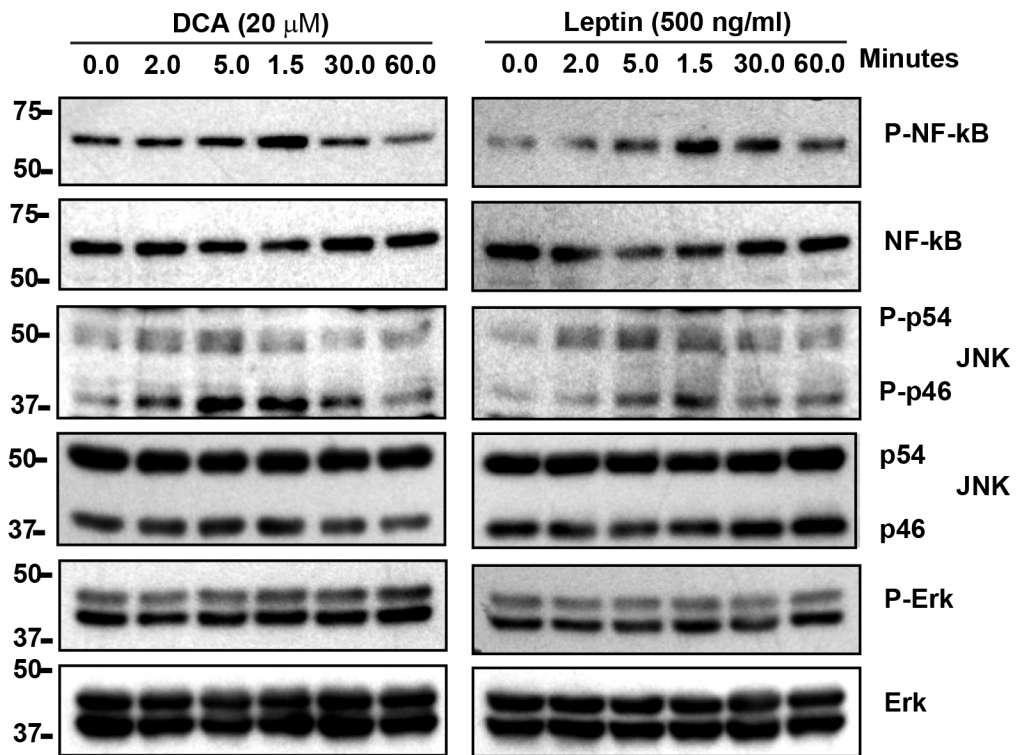

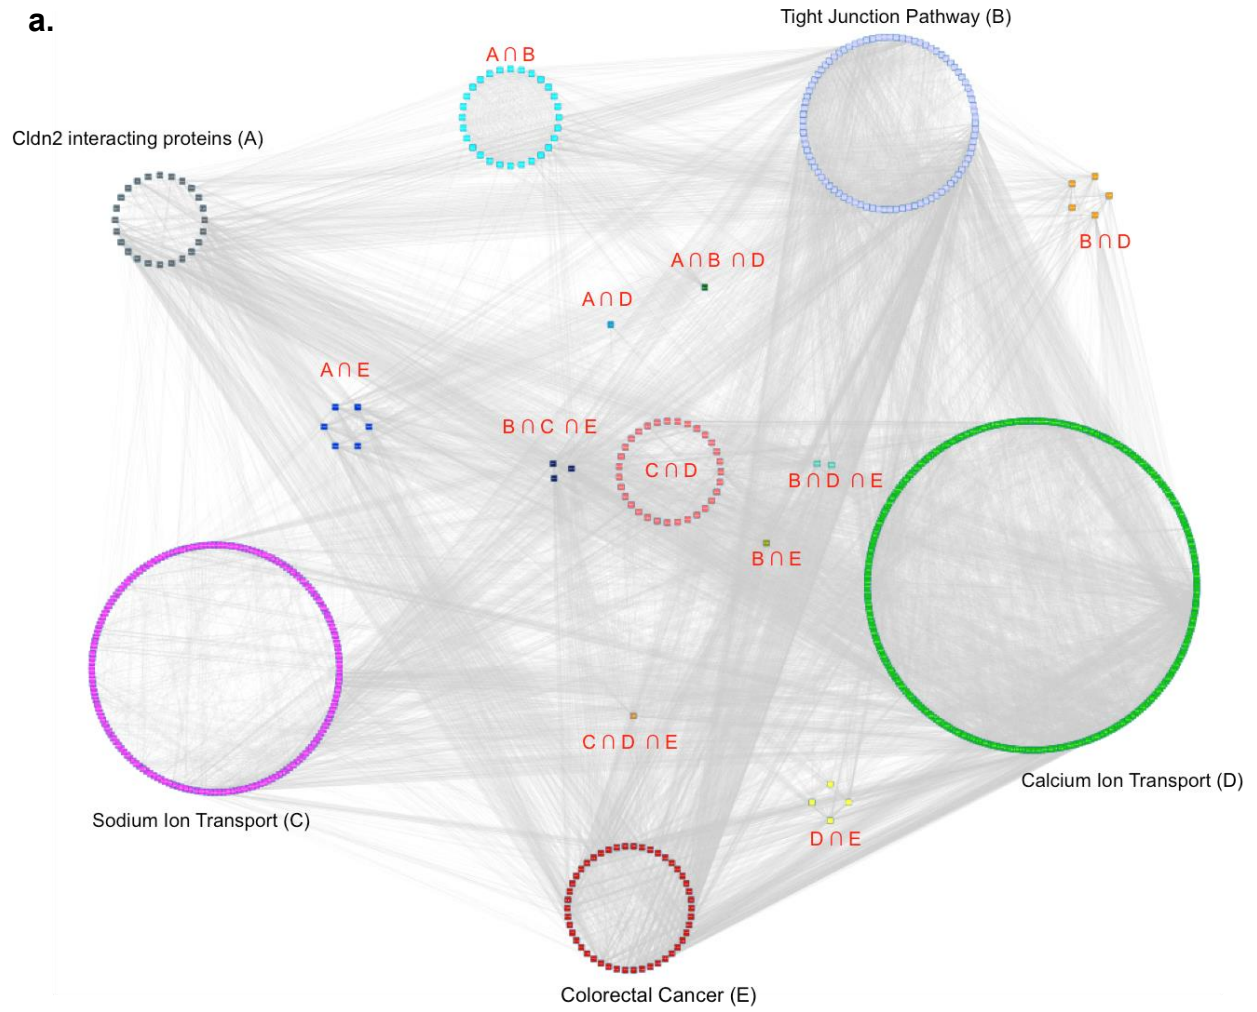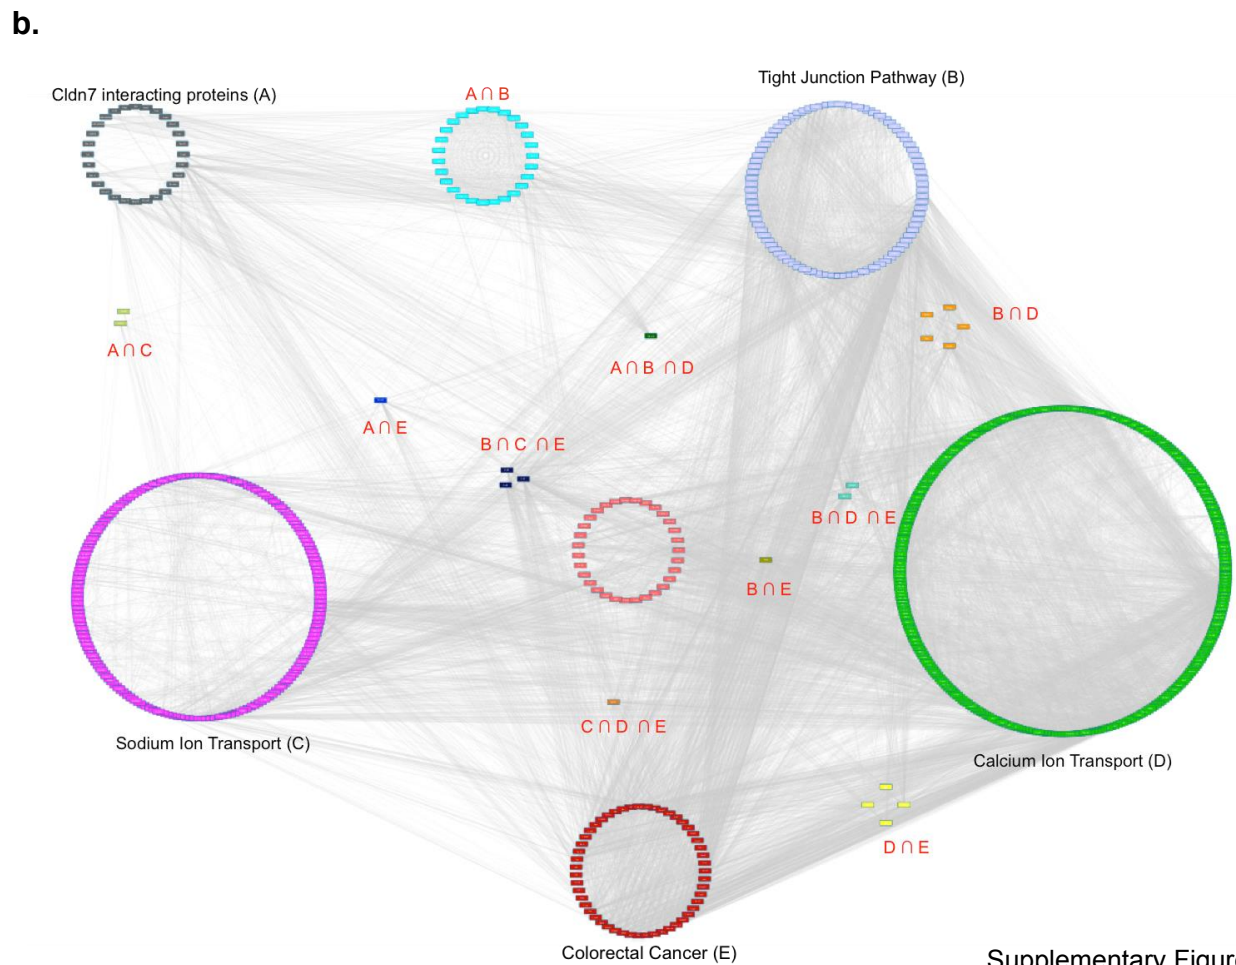

Supplement: 41598_2017_4989_MOESM1_ESM.pdf [file 41598_2017_4989_MOESM1_ESM.pdf]
